# Supplementary material for: Changes of Tamarix austromongolica forests with embankment dams along the Laizhou bay
Source: PeerJ journal article supplement (doi:10.7717/peerj.17934), 2024-08-23
Supplement: Coastforestsdata.xlsx [file Coastforestsdata.xlsx]

## Sheet: Table 1
Table 1. Small quadrats in supratidal flat before the dams
note: present, 1; absent, 0； qudrat size, 1×1 m
quadrat code	Tamarix austromongolica	Suaeda salsa	Phragmites australis	Mulgedium tataricum
1	0	1	0	0
2	0	1	0	0
3	0	1	0	0
4	1	1	0	0
5	0	1	0	0
6	0	1	0	0
7	0	1	0	0
8	1	1	1	0
9	0	1	1	0
10	0	1	1	0
11	0	1	1	0
12	0	1	1	0
13	0	1	1	0
14	0	1	0	0
15	0	1	0	0
16	0	1	0	0
17	0	1	0	0
18	0	0	0	0
19	0	0	0	0
20	0	0	0	0
21	0	0	0	0
22	0	0	0	0
23	0	0	0	0
24	0	0	0	0
25	0	0	0	0
26	0	1	0	0
27	0	1	0	0
28	0	0	0	0
29	0	0	0	0
30	0	0	0	0
31	0	0	0	0
32	0	0	0	0
33	0	0	0	0
34	0	0	0	0
35	0	0	0	0
36	0	0	0	0
37	0	0	0	0
38	0	1	0	0
39	0	1	0	0
40	0	1	0	0
41	0	0	0	0
42	0	0	0	0
43	0	0	0	0
44	0	1	0	0
45	0	1	0	0
46	0	1	0	0
47	0	1	0	0
48	0	1	0	0
49	0	1	0	0
50	0	1	0	0
51	0	1	0	0
52	0	1	1	0
53	1	1	1	0
54	1	1	1	0
55	1	1	1	1
56	0	1	1	0
57	0	1	1	1
58	0	1	1	0
59	0	1	1	0
60	0	1	0	0
61	0	1	0	0
62	0	1	0	0
63	0	0	0	0
64	0	0	0	0
65	0	1	0	0
66	0	1	0	0
67	0	1	0	0
68	0	1	1	0
69	0	1	1	0
70	0	1	1	0
71	0	1	0	0
72	0	1	0	0
73	0	1	0	0
74	0	0	0	0
75	0	0	0	0
76	0	0	0	0
77	0	0	0	0
78	0	0	0	0
79	0	1	0	0
80	0	1	0	0
81	0	0	0	0
82	0	0	0	0
83	0	0	0	0
84	0	0	0	0
85	0	0	0	0
86	0	0	0	0
87	0	0	0	0
88	0	0	0	0
89	0	0	0	0
90	0	0	0	0
91	0	1	0	0
92	0	0	0	0
93	0	0	0	0
94	0	0	0	0
95	0	0	0	0
96	0	0	0	0
97	0	1	1	0
98	0	1	1	0
99	1	1	1	0
100	0	1	0	0
101	0	0	0	0
102	0	1	0	0
103	0	1	0	0
104	1	1	0	0
105	1	1	1	0
106	1	1	1	0
107	1	1	1	0
108	1	1	1	0
109	1	1	0	0
110	1	1	0	0
111	0	1	0	0
112	0	0	0	0
113	0	0	0	0
114	0	1	0	0
115	0	1	0	0
116	0	1	0	0
117	0	0	0	0
118	0	0	0	0
119	0	1	0	0
120	0	0	0	0
121	0	0	0	0
122	0	0	0	0
123	0	0	0	0
124	0	0	0	0
125	0	0	0	0
126	0	0	0	0
127	0	0	0	0
128	0	0	0	0
129	0	1	0	0
130	0	1	0	0
131	0	1	0	0
132	0	0	0	0
133	0	0	0	0
134	0	1	1	0
135	1	1	1	0
136	1	0	1	0
137	1	0	1	0
138	0	1	1	0
139	0	1	1	0
140	0	1	0	0
141	0	0	0	0
142	0	0	0	0
143	0	0	0	0
144	0	0	0	0
145	1	1	0	0
146	1	1	0	0
147	0	1	0	0
148	0	1	0	0
149	0	1	0	0
150	0	1	0	0
151	0	0	0	0
152	0	0	0	0
153	0	0	0	0
154	0	0	0	0
155	0	0	0	0
156	0	0	0	0
157	0	0	0	0
158	0	0	0	0
159	0	0	0	0
160	0	0	0	0
161	0	1	0	0
162	0	1	0	0
163	0	1	0	0
164	0	1	0	0
165	0	1	0	0
166	0	0	0	0
167	0	0	0	0
168	0	0	0	0
169	0	0	0	0
170	0	1	0	0
171	0	1	0	0
172	0	1	0	0
173	0	1	0	0
174	0	1	0	0
175	0	1	0	0
176	0	1	0	0
177	0	1	1	0
178	0	1	1	0
179	0	1	1	0
180	0	1	1	0
181	0	1	1	0
182	1	1	1	0
183	1	1	0	0
184	0	1	0	0
185	0	1	0	0
186	0	1	0	0
187	0	1	0	0
188	0	1	0	0
189	0	1	0	0
190	0	1	0	0
191	0	1	0	0
192	0	1	0	0
193	0	1	0	0
194	0	1	0	0
195	0	1	0	0
196	0	1	1	0
197	1	1	1	0
198	1	1	1	0
199	0	1	1	0
200	0	1	1	0
201	0	0	0	0
202	0	1	0	0
203	0	1	0	0
204	0	0	0	0
205	1	1	0	0
206	0	1	0	0
207	0	0	0	0
208	0	0	0	0
209	0	0	0	0
210	0	1	0	0
211	0	1	0	0
212	0	1	0	0
213	0	0	0	0
214	0	0	0	0
215	1	1	0	0
216	0	1	1	0
217	0	1	0	0
218	0	0	0	0
219	0	0	0	0
220	0	0	0	0
221	0	1	0	0
222	0	1	0	0
223	0	0	0	0
224	0	0	0	0
225	0	1	0	0
226	0	1	0	0
227	0	0	0	0
228	0	0	0	0
229	0	0	0	0
230	0	0	0	0
231	0	0	0	0
232	0	0	0	0
233	0	0	0	0
234	0	0	0	0
235	0	0	0	0
236	0	1	0	0
237	0	0	0	0
238	0	1	0	0
239	0	1	0	0
240	0	0	0	0
241	0	0	0	0
242	0	1	0	0
243	0	0	0	0
244	0	0	0	0
245	0	0	0	0
246	0	0	0	0
247	0	1	0	0
248	0	1	0	0
249	0	0	0	0
250	0	1	0	0
251	0	1	1	0
252	1	1	1	0
253	1	1	1	0
254	0	1	1	0
255	0	1	0	0
256	0	1	0	0
257	0	0	0	0
258	0	0	0	0
259	0	0	0	0
260	0	0	0	0
261	0	0	0	0
262	0	0	0	0
263	0	0	0	0
264	0	0	0	0
265	0	1	0	0
266	1	1	0	0
267	0	1	0	0
268	0	1	1	0
269	0	0	0	0
270	0	0	0	0
271	0	0	0	0
272	0	0	0	0
273	0	0	0	0
274	0	0	0	0
275	0	0	0	0
276	0	0	0	0
277	0	0	0	0
278	0	0	0	0
279	0	0	0	0
280	0	0	0	0
281	0	0	0	0
282	0	0	0	0
283	0	0	0	0
284	0	0	0	0
285	0	0	0	0
286	0	0	0	0
287	0	1	0	0
288	0	0	0	0
289	0	0	0	0
290	0	0	0	0
291	0	1	0	0
292	0	1	0	0
293	0	1	0	0
294	0	1	0	0
295	0	0	0	0
296	0	0	0	0
297	0	1	0	0
298	1	1	0	0
299	0	1	0	0
300	0	1	0	0

## Sheet: Table 2
Table 2. Small quadrats in sandy land behind the dams
note: present, 1; absent, 0； qudrat size, 1×1 m
quadrat code	Tamarix austromongolica	Descurainia sophia	Coreopsis grandiflora	Kochia scoparia	Lepidium apetalum	Cynanchum chinense	Setaria viridis	Chenopodium album	Suaeda salsa	Phragmites australis	Bromus japonicus	Mulgedium tataricum	Conyza canadensis	Salsola collina	Artemisia scoparia	Poa annua
1	1	0	0	0	0	1	0	0	0	0	0	0	1	0	1	0
2	1	0	0	0	0	0	0	0	0	1	0	0	1	0	1	0
3	0	0	0	0	0	0	1	0	0	0	0	0	1	0	1	0
4	0	0	0	0	0	0	0	0	0	0	0	0	1	0	1	0
5	0	0	0	0	0	0	0	0	0	0	0	0	1	0	1	0
6	0	0	0	0	0	1	0	0	0	0	1	0	1	0	1	0
7	1	0	0	0	0	1	0	0	0	0	0	0	1	0	1	0
8	1	0	0	0	0	0	1	0	0	0	0	0	0	0	1	0
9	0	0	0	0	0	1	0	0	0	0	0	0	1	0	1	0
10	0	0	0	0	0	0	0	0	0	0	0	0	1	0	1	0
11	0	0	0	0	0	0	0	0	0	0	0	0	1	0	1	1
12	0	0	0	0	0	0	0	0	0	0	0	0	0	0	1	0
13	0	0	0	0	0	0	0	0	0	0	0	0	0	0	1	1
14	1	0	0	0	0	0	0	0	0	0	0	0	0	0	1	0
15	1	0	0	0	0	0	0	0	0	0	0	0	0	0	1	0
16	1	0	0	0	0	0	0	0	0	0	0	0	0	0	1	0
17	1	0	0	0	0	0	0	0	0	0	0	0	1	0	1	0
18	0	0	0	0	0	0	0	0	0	0	0	0	1	0	1	0
19	1	0	0	0	0	0	0	0	0	0	0	0	1	0	1	0
20	0	1	0	0	0	0	0	1	0	0	0	0	1	1	1	0
21	0	1	0	0	0	0	0	1	0	0	0	0	0	1	0	0
22	0	1	0	0	0	0	0	0	0	0	0	0	1	1	0	0
23	0	0	0	0	0	0	0	0	0	0	0	0	1	0	1	0
24	0	0	0	0	0	0	0	0	0	0	0	0	1	0	0	0
25	0	0	0	0	0	0	0	0	0	0	0	0	1	0	1	0
26	0	0	0	0	0	0	0	0	0	0	0	0	1	0	0	0
27	0	0	1	0	0	1	1	0	0	0	0	0	1	0	1	0
28	0	0	0	0	0	0	0	0	0	0	0	0	1	1	0	0
29	0	0	0	0	0	0	0	0	0	0	0	0	1	1	1	0
30	0	0	0	0	0	0	0	0	0	0	0	0	1	0	1	0
31	0	0	0	0	0	0	0	0	0	0	0	0	1	0	1	0
32	0	0	0	0	0	0	0	0	0	0	0	0	1	0	1	0
33	0	0	0	0	0	0	0	0	0	0	0	0	0	0	1	0
34	0	0	0	0	0	0	0	0	0	0	0	0	0	0	1	0
35	0	0	0	0	0	0	0	0	0	0	0	0	0	0	1	0
36	0	0	0	0	0	0	0	0	0	0	0	0	1	0	1	0
37	0	0	0	0	0	0	0	0	0	0	0	0	1	0	1	0
38	0	0	0	0	0	0	0	1	0	0	0	0	1	0	1	0
39	0	0	0	0	0	0	0	0	0	0	0	0	1	0	1	0
40	0	0	0	0	0	1	0	0	0	0	0	0	1	0	1	0
41	0	0	0	0	0	0	0	0	0	0	0	0	1	0	1	0
42	0	0	0	0	0	0	0	0	0	0	0	0	1	0	1	0
43	0	0	0	0	0	1	0	0	0	0	0	0	1	1	1	0
44	0	0	0	0	0	0	0	1	0	0	1	0	1	0	1	0
45	0	0	0	0	0	1	0	0	0	0	0	0	1	0	1	0
46	1	0	0	0	0	1	0	0	0	0	0	0	1	0	1	0
47	1	0	0	0	0	1	0	0	0	0	0	0	1	1	1	0
48	0	0	0	0	0	1	0	0	0	0	0	0	1	1	0	0
49	0	0	0	0	0	1	0	0	0	0	0	0	0	1	1	0
50	0	0	0	0	1	1	0	0	0	0	0	0	1	0	0	0
51	0	0	0	0	0	1	0	0	0	0	0	0	1	1	0	0
52	0	0	0	0	0	0	0	0	0	0	0	0	0	1	0	0
53	0	0	0	0	0	0	0	0	0	0	0	0	0	1	1	0
54	0	0	0	0	0	0	0	0	0	0	0	0	0	1	0	0
55	0	0	0	0	0	0	0	0	0	0	0	0	1	1	1	0
56	0	0	0	0	0	0	0	0	0	0	0	0	0	1	1	0
57	0	0	0	0	0	0	0	0	0	0	0	0	0	1	1	0
58	0	0	0	0	0	0	0	0	0	0	0	0	0	1	1	0
59	1	0	0	0	0	0	0	0	0	0	0	0	1	0	1	0
60	1	0	0	0	0	0	0	0	0	0	0	0	1	0	1	0
61	0	0	0	0	0	0	0	0	0	0	0	0	0	1	0	0
62	0	0	0	0	0	0	0	0	0	0	0	0	0	1	1	0
63	0	0	0	0	1	0	0	0	0	0	0	0	0	1	1	0
64	0	0	0	0	0	0	0	0	0	0	0	0	1	1	0	0
65	0	0	0	0	0	0	0	0	0	0	0	0	1	0	1	0
66	0	0	0	0	0	0	0	0	0	0	0	0	1	0	1	0
67	1	0	0	0	0	0	0	0	0	0	0	0	1	1	1	0
68	0	0	0	0	0	0	0	0	0	0	0	0	1	0	1	0
69	0	0	0	0	0	0	0	0	0	0	0	0	0	0	1	0
70	0	0	0	0	0	0	0	0	0	0	0	0	1	0	1	0
71	0	0	0	0	0	0	0	0	0	0	0	0	1	0	1	0
72	1	0	0	0	0	1	0	0	0	0	0	0	0	0	1	0
73	1	0	0	0	0	1	0	0	0	0	0	0	0	0	1	0
74	0	0	0	0	0	0	0	0	0	0	0	0	0	0	1	0
75	0	0	0	0	0	0	0	0	0	0	0	0	1	0	1	0
76	0	0	0	0	0	0	0	0	0	0	0	0	1	0	1	0
77	0	0	0	0	0	0	0	0	0	0	0	0	1	0	1	0
78	0	0	0	0	0	0	0	0	0	0	0	0	1	0	1	1
79	0	0	0	0	0	0	0	0	0	0	0	0	1	0	1	1
80	1	0	0	0	0	0	0	0	0	0	0	0	1	0	1	0
81	1	0	0	0	0	0	0	0	0	0	0	0	1	0	0	0
82	0	0	0	0	0	0	0	0	0	0	0	0	1	0	1	0
83	0	0	0	0	0	0	0	0	0	0	0	0	1	0	1	0
84	0	0	0	0	0	0	0	0	0	1	0	0	1	1	1	0
85	0	0	0	0	0	0	0	0	0	1	0	0	1	0	1	0
86	0	0	0	0	0	0	0	0	0	1	0	0	0	1	1	0
87	0	0	0	0	0	0	0	0	0	1	0	0	1	0	1	0
88	0	0	0	0	0	0	0	0	0	0	0	0	0	0	1	1
89	1	0	0	0	0	0	0	0	0	0	0	0	1	0	1	0
90	1	0	0	0	0	0	1	0	0	0	0	0	1	0	1	0
91	0	0	0	0	0	1	0	0	0	0	0	0	1	0	1	0
92	0	0	0	0	0	1	0	0	0	0	0	0	1	0	1	0
93	0	0	0	0	0	0	0	0	0	0	0	0	1	0	1	0
94	0	0	0	0	0	0	0	0	0	0	0	0	1	0	1	0
95	0	0	0	0	0	1	0	0	0	0	0	0	1	0	1	0
96	0	0	0	0	0	1	0	0	0	0	0	0	1	0	0	1
97	1	0	0	0	0	1	0	0	0	0	0	0	1	0	1	0
98	1	0	0	0	0	1	0	0	0	0	0	0	0	0	1	0
99	0	0	0	0	0	0	0	0	0	0	0	0	1	0	1	0
100	0	0	0	0	0	0	0	0	0	0	0	0	1	1	1	0
101	0	0	0	0	0	0	1	0	0	0	0	0	1	0	1	0
102	0	0	0	0	0	0	1	0	0	0	0	0	0	1	1	0
103	0	0	0	0	1	1	0	0	0	0	0	0	1	0	1	0
104	0	0	0	0	0	0	0	0	0	0	0	0	1	1	1	0
105	1	0	0	0	0	0	0	0	0	0	0	0	1	0	1	0
106	0	0	0	0	0	1	0	0	0	0	0	0	1	0	1	0
107	0	0	0	0	0	1	0	1	0	0	0	0	1	1	0	0
108	0	0	0	0	0	0	0	0	0	0	0	0	1	1	0	0
109	0	0	0	0	1	0	0	0	0	0	0	0	0	1	0	0
110	0	0	0	0	0	0	0	0	0	0	0	0	0	1	0	0
111	0	0	0	0	0	1	0	0	0	0	0	0	0	1	0	0
112	1	0	0	0	0	1	0	0	0	1	0	0	1	0	0	0
113	1	0	0	0	0	1	0	0	0	0	0	0	1	0	0	0
114	0	0	0	0	0	0	0	0	0	0	0	0	1	0	0	0
115	0	0	0	0	0	1	0	0	0	0	0	0	1	0	1	0
116	0	0	0	0	0	1	0	0	0	0	0	0	1	0	0	0
117	0	0	0	0	0	1	0	0	0	0	0	0	1	0	0	0
118	1	0	0	0	0	1	0	0	0	0	0	0	1	0	1	0
119	1	0	0	0	0	0	0	0	0	0	0	0	1	0	1	0
120	0	0	0	0	0	0	0	0	0	0	0	0	1	0	1	0
121	0	0	0	0	1	1	0	0	0	0	0	0	1	0	1	0
122	0	0	0	0	0	0	0	0	0	0	0	0	0	0	1	0
123	0	0	0	0	0	0	0	0	0	0	0	0	0	0	1	0
124	1	0	0	0	0	1	0	0	0	0	0	0	0	0	1	0
125	1	0	0	0	0	0	0	0	0	0	0	0	0	0	1	0
126	0	0	0	0	0	0	0	0	0	0	0	0	1	0	1	0
127	0	0	0	0	0	0	0	0	0	1	0	0	1	0	1	0
128	0	0	0	0	0	0	0	0	0	0	0	0	1	0	1	0
129	0	0	0	0	0	1	0	0	0	0	0	0	1	0	1	0
130	2	0	0	0	0	0	0	0	0	0	0	0	0	0	0	0
131	0	0	0	0	0	0	0	0	0	0	0	1	0	0	1	1
132	0	0	0	0	0	1	0	0	0	0	0	1	0	0	1	1
133	0	0	0	0	0	1	0	0	0	0	0	1	0	0	1	1
134	0	0	0	0	0	0	0	0	0	0	0	1	1	0	0	1
135	0	0	0	0	0	0	1	0	0	0	0	0	1	0	1	0
136	0	0	0	0	0	0	0	1	0	0	0	1	1	0	0	0
137	0	0	0	0	0	0	1	0	0	0	0	0	1	0	1	0
138	0	0	0	0	0	0	0	0	0	0	0	0	1	0	0	0
139	0	0	0	0	0	0	0	0	0	0	0	0	1	0	0	0
140	0	0	0	0	0	0	0	0	0	0	0	0	1	0	0	0
141	0	1	0	0	0	0	0	0	0	0	0	0	1	0	1	0
142	0	0	0	0	0	0	0	0	0	0	0	1	1	0	1	0
143	0	0	0	0	0	0	0	0	0	0	0	0	1	0	1	0
144	0	0	0	0	0	1	0	0	0	0	0	1	0	0	1	1
145	0	0	0	0	0	0	0	0	0	0	0	1	0	0	1	1
146	0	0	0	0	0	0	0	0	0	0	0	1	1	0	1	0
147	1	0	0	0	0	1	0	0	0	0	0	1	1	0	1	0
148	1	0	0	0	0	1	0	0	0	0	0	1	1	0	0	0
149	0	0	0	0	0	1	0	0	0	0	0	0	1	0	0	0
150	0	0	0	0	0	1	0	0	0	0	0	1	1	0	0	0
151	0	1	0	0	0	0	0	0	0	0	0	1	1	0	0	0
152	1	0	0	0	0	0	0	1	0	0	0	1	0	1	0	0
153	1	0	0	0	0	0	0	0	0	0	0	0	1	1	1	0
154	0	0	0	0	0	0	0	0	0	0	0	0	1	1	1	0
155	0	0	0	0	0	0	0	0	0	0	0	0	1	1	1	0
156	0	0	0	0	0	0	0	0	0	0	0	1	0	1	1	0
157	0	0	0	0	0	0	0	0	0	0	0	0	1	0	1	0
158	0	0	0	0	0	0	0	0	0	0	0	1	1	0	1	0
159	1	0	0	0	0	0	0	0	0	0	0	1	1	0	1	0
160	0	0	0	0	0	0	0	0	0	0	0	0	0	0	1	0
161	1	0	0	0	0	0	0	0	0	0	0	0	1	0	1	0
162	0	0	0	0	0	0	0	0	1	0	0	0	1	0	1	0
163	0	0	0	0	0	0	0	0	0	0	0	0	1	0	1	0
164	0	0	0	0	0	0	0	0	0	1	0	0	1	0	0	0
165	0	0	0	0	0	0	0	0	0	1	0	0	1	0	0	0
166	0	0	0	0	0	0	0	0	0	1	0	0	1	0	1	0
167	0	0	0	0	0	1	0	0	0	1	0	0	1	0	1	0
168	1	0	0	0	0	1	0	0	0	0	0	0	1	0	1	0
169	0	0	0	0	0	0	0	0	0	1	0	0	1	0	1	0
170	0	0	0	0	0	0	0	0	0	1	0	0	1	0	1	0
171	0	0	0	0	0	1	0	0	0	0	0	0	1	0	1	0
172	0	0	0	0	0	0	0	0	0	1	0	0	1	0	0	0
173	0	0	0	0	0	0	0	0	0	1	0	0	1	0	0	0
174	1	0	0	0	0	0	0	0	0	1	0	0	1	0	1	0
175	1	0	0	0	0	0	1	0	0	0	0	0	1	0	1	0
176	0	0	0	0	0	1	0	0	0	0	0	0	1	0	1	0
177	0	0	0	0	0	0	0	0	0	0	0	0	1	0	0	0
178	0	0	0	0	0	0	1	0	0	0	0	0	1	0	0	0
179	0	0	0	0	0	0	0	0	0	0	0	0	1	0	0	0
180	0	0	0	0	0	0	0	0	0	0	0	0	1	0	0	0
181	0	0	0	0	0	0	0	0	0	0	0	0	1	0	0	0
182	0	0	0	0	0	0	0	0	0	0	0	0	1	0	0	0
183	0	0	0	0	0	0	0	0	0	0	0	0	1	0	0	1
184	0	0	0	0	0	0	1	0	0	0	0	0	1	0	1	0
185	0	0	0	0	0	0	1	0	0	0	0	0	1	0	0	0
186	0	0	0	0	0	0	1	0	0	0	0	0	1	0	0	0
187	1	0	0	0	0	0	1	0	0	0	0	0	1	0	0	0
188	1	0	0	0	0	1	1	0	0	0	0	0	1	0	0	1
189	0	0	0	0	0	0	1	0	0	0	0	0	1	0	0	0
190	0	0	0	0	0	0	1	0	0	0	0	0	1	0	0	0
191	0	0	0	0	0	0	1	0	0	0	0	0	1	0	0	0
192	0	0	0	0	0	0	1	0	0	0	0	0	1	0	0	0
193	0	0	0	0	0	1	0	0	0	0	0	0	1	0	0	0
194	1	0	0	0	0	1	0	0	0	0	0	0	1	0	0	0
195	1	0	0	0	0	1	0	0	0	0	0	0	1	0	0	0
196	0	0	0	0	0	0	0	0	0	0	0	0	1	0	1	0
197	0	0	0	0	0	0	0	0	0	0	0	0	1	0	0	0
198	0	0	0	0	0	0	0	0	0	0	0	0	1	0	0	0
199	0	0	0	0	0	1	0	0	0	0	0	0	1	0	0	0
200	0	0	0	0	0	0	0	0	0	0	0	0	1	0	0	0
201	0	0	0	0	0	0	0	0	0	0	0	0	1	0	0	0
202	1	0	0	0	0	0	0	0	0	0	0	0	1	0	0	0
203	0	0	0	0	0	0	0	0	0	0	0	1	1	0	0	0
204	0	0	0	0	0	1	0	0	0	0	0	1	1	0	0	0
205	0	0	0	0	0	0	0	0	0	0	0	1	1	0	0	0
206	1	0	0	0	0	1	0	0	0	0	0	1	0	0	0	0
207	1	0	0	0	0	1	0	0	0	0	0	1	1	0	0	0
208	0	0	0	0	0	0	0	0	0	0	0	1	1	0	0	0
209	0	0	0	0	0	0	0	0	0	0	0	1	1	0	0	0
210	0	0	0	0	0	0	0	0	0	0	0	1	1	0	0	0
211	1	0	0	0	0	1	0	0	0	0	0	0	1	0	0	0
212	1	0	0	0	0	1	0	0	0	0	0	1	1	0	0	0
213	0	0	0	0	0	0	0	0	0	0	0	1	1	0	1	0
214	0	0	0	0	0	0	0	0	0	0	0	0	1	0	1	0
215	0	0	0	0	0	0	0	0	0	0	0	1	1	0	1	0
216	0	0	0	0	0	0	0	0	0	0	0	0	1	0	0	0
217	1	0	0	0	0	0	0	0	0	0	0	0	1	0	0	0
218	1	0	0	0	0	1	0	0	0	0	0	0	1	0	1	0
219	0	0	0	0	0	0	0	0	0	0	0	0	1	0	1	0
220	1	0	0	0	0	0	0	0	0	0	0	0	1	0	1	0
221	0	0	0	0	0	0	0	0	0	0	0	0	1	0	1	0
222	0	0	0	0	0	0	0	0	0	0	0	0	1	0	1	0
223	0	0	0	0	0	0	0	0	0	1	0	0	0	0	1	0
224	1	0	0	0	0	0	0	0	0	0	0	0	1	0	1	0
225	1	0	0	0	0	0	0	0	0	0	0	0	1	0	1	0
226	0	0	0	0	0	0	0	0	0	0	0	0	1	0	1	0
227	0	0	0	0	0	0	0	0	0	1	0	1	1	0	1	0
228	1	0	0	0	0	0	0	0	0	1	0	0	1	0	1	0
229	1	0	0	0	0	0	0	0	0	0	0	0	1	0	1	0
230	0	0	0	0	0	0	0	0	0	0	0	0	1	0	1	0
231	1	0	0	0	0	0	0	0	0	0	0	0	1	0	1	0
232	1	0	0	0	0	0	0	0	0	0	0	0	1	0	1	0
233	1	0	0	0	0	0	0	0	0	0	0	0	1	0	1	0
234	0	0	0	0	0	0	0	0	0	0	0	0	1	0	1	0
235	0	0	0	0	0	1	0	0	0	0	0	0	1	0	1	0
236	1	0	0	0	0	0	0	0	0	0	0	0	1	0	1	0
237	1	0	0	0	0	0	0	0	0	0	0	0	0	0	1	0
238	1	0	0	0	0	0	0	0	0	1	0	0	0	0	1	0
239	0	0	0	0	0	0	0	0	0	1	0	0	1	0	1	0
240	0	0	0	0	0	0	0	0	0	0	0	0	1	0	1	0
241	0	0	0	0	0	1	0	0	0	0	0	0	1	0	1	0
242	1	0	0	0	0	0	0	0	0	0	0	0	1	0	1	0
243	1	0	0	0	0	0	0	0	0	0	0	0	1	0	1	0
244	2	0	0	0	0	0	0	0	0	0	0	0	1	0	0	0
245	1	0	0	0	0	0	0	0	0	0	0	1	1	0	1	0
246	0	0	0	0	0	0	0	0	0	0	0	1	1	0	1	0
247	0	0	0	0	0	0	0	0	0	0	0	0	1	0	1	0
248	0	0	0	0	0	0	0	0	0	0	0	0	1	0	1	0
249	0	0	0	0	0	0	0	0	0	0	0	1	1	0	1	0
250	0	0	0	0	0	0	0	0	0	0	0	1	1	0	1	0
251	0	0	0	0	0	0	0	0	0	0	0	1	0	0	1	1
252	0	0	0	0	0	0	0	0	0	0	0	1	0	0	1	0
253	0	0	0	0	0	0	0	0	0	0	0	1	0	0	1	0
254	0	0	0	0	0	0	0	0	0	0	0	1	0	0	1	0
255	0	0	0	0	0	0	0	0	0	0	0	1	0	0	1	0
256	0	0	0	0	0	0	0	0	0	0	0	1	0	0	1	1
257	0	0	0	0	0	1	0	0	0	0	0	1	0	0	1	0
258	0	0	0	0	0	1	0	0	0	0	0	1	0	0	1	0
259	0	0	0	0	0	0	0	0	0	0	0	1	1	0	1	0
260	0	0	0	0	0	0	0	0	0	0	0	1	1	0	1	0
261	1	0	0	0	0	0	0	0	0	0	0	0	1	0	1	0
262	1	0	0	0	0	0	0	0	0	0	0	0	0	0	1	0
263	1	0	0	0	0	0	0	0	0	0	0	0	0	0	1	0
264	0	0	0	0	0	0	0	0	0	0	0	0	1	0	1	0
265	0	0	0	0	0	1	0	0	0	0	0	0	1	0	1	0
266	0	0	0	0	0	1	0	0	0	1	0	0	1	0	1	0
267	0	0	0	0	0	0	0	0	0	1	0	1	0	0	1	0
268	0	0	0	0	0	0	0	0	0	0	0	1	0	0	1	0
269	1	0	0	0	0	0	0	0	0	0	0	1	0	0	1	1
270	0	0	0	0	0	0	0	0	0	0	0	1	1	0	1	0
271	0	0	0	0	0	0	0	0	0	0	0	0	1	0	1	0
272	0	0	0	0	0	0	0	0	0	0	0	1	1	0	1	0
273	0	0	0	0	0	0	0	0	0	0	0	0	1	0	1	0
274	1	0	0	0	0	0	0	0	0	0	0	0	1	0	1	0
275	1	0	0	0	0	1	0	0	0	0	0	0	1	0	1	0
276	1	0	0	0	0	0	0	0	0	0	0	1	1	0	1	0
277	1	0	0	0	0	0	0	0	0	0	0	1	1	0	1	0
278	0	0	0	0	0	1	0	0	0	0	0	0	1	0	1	0
279	0	0	0	0	0	0	1	0	0	0	0	1	1	0	1	0
280	0	0	0	0	0	0	0	0	0	0	0	0	1	0	1	0
281	0	0	0	0	0	0	0	0	0	1	0	1	0	0	1	0
282	0	0	0	0	0	0	0	0	0	0	0	1	0	0	1	0
283	0	0	0	0	0	0	0	0	0	0	0	0	0	0	1	0
284	0	0	0	0	0	0	0	0	0	0	0	0	0	0	1	0
285	0	0	0	0	0	0	0	0	0	0	0	0	1	0	1	0
286	0	0	0	0	0	1	0	0	0	0	0	0	1	0	1	0
287	0	0	0	0	0	0	0	0	0	0	0	0	1	0	1	0
288	0	0	0	0	0	1	0	0	0	0	0	0	1	0	1	0
289	0	0	0	0	0	1	0	0	0	0	0	0	1	0	1	0
290	0	0	0	0	0	1	0	0	0	0	0	0	0	0	1	0
291	0	0	0	0	0	1	0	0	0	0	0	0	0	0	1	0
292	0	0	0	0	0	1	0	0	0	0	0	0	0	0	1	0
293	0	0	0	0	0	1	0	0	0	0	0	0	0	0	1	0
294	0	0	0	0	0	0	0	0	0	0	0	0	1	0	1	0
295	0	0	0	0	0	1	0	0	0	0	0	0	1	0	1	0
296	0	0	0	0	0	0	1	0	0	0	0	0	1	0	1	0
297	0	0	0	0	0	1	0	0	0	0	0	0	1	0	1	0
298	0	0	0	0	0	1	0	0	0	0	0	0	1	1	1	0
299	0	0	0	0	0	1	0	0	0	0	0	0	1	0	1	0
300	0	0	0	0	0	1	0	0	0	0	0	0	1	0	1	0

## Sheet: Table 3
Table 3. Tamarix austromongolica shrubs occurring in supratidal flat before the dams
Note: juvenile, basal diameter <=3cm; adult, basal diameter >3 cm; quadrat size, 10×10 m
quadrat code with Tamarix austromongolica	class	branch number	maximum basal diameter (cm)	height（cm）
1	juvenile	3	3	160
1	juvenile	4	2	120
1	juvenile	2	1.5	80
1	juvenile	2	1	70
1	adult	4	3.5	120
1	juvenile	4	2.5	130
1	adult	3	5	150
1	adult	8	4	160
1	adult	3	3.5	130
2	juvenile	3	3	130
2	juvenile	2	3	130
2	juvenile	4	1.5	60
2	juvenile	3	2.5	90
2	juvenile	3	2	110
2	adult	5	3.5	100
2	juvenile	1	1.5	60
2	juvenile	2	2	75
2	juvenile	3	1.5	60
2	juvenile	3	2.5	130
2	juvenile	2	3	130
2	juvenile	2	1.5	70
2	juvenile	1	1	65
2	juvenile	3	1	60
3	juvenile	2	0.5	50
3	juvenile	2	1.5	65
3	juvenile	1	1.5	60
3	juvenile	4	2	70
3	juvenile	1	1	75
3	juvenile	2	0.5	75
3	juvenile	2	1.5	100
3	juvenile	5	1.5	130
3	adult	6	3.5	165
3	juvenile	1	1.5	110
3	juvenile	3	1	60
3	juvenile	3	1	80
3	adult	3	4	100
3	juvenile	3	2	75
3	adult	6	3.5	150
3	juvenile	4	2	90
3	juvenile	2	0.5	80
3	juvenile	3	1.5	110
3	juvenile	4	1	60
3	juvenile	1	0.5	80
4	juvenile	3	2.5	100
4	juvenile	2	2.5	90
4	juvenile	3	2	80
4	juvenile	1	1.5	90
4	juvenile	2	1.5	55
4	juvenile	2	3	90
4	juvenile	1	3	120
4	juvenile	2	1	70
4	juvenile	1	1.5	40
4	juvenile	2	1.5	60
4	juvenile	3	2.5	60
4	adult	3	3.5	110
5	juvenile	4	2.5	120
5	juvenile	3	2.5	80
5	juvenile	4	2	90
5	juvenile	3	3	140
5	adult	3	4	160
5	adult	3	4	155
5	adult	3	3.5	160
5	juvenile	3	2.5	140
5	juvenile	2	2	120
5	adult	3	3.5	150
5	juvenile	2	1	50
5	juvenile	1	0.5	55
5	juvenile	1	1.5	60
5	adult	3	5.5	150
5	juvenile	2	2.5	110
5	juvenile	2	2	120
5	juvenile	3	0.5	70
6	juvenile	3	2.5	130
6	juvenile	3	2	130
6	juvenile	4	2	140
6	juvenile	4	2	135
6	juvenile	4	2	90
6	juvenile	2	2.5	60
6	juvenile	1	2.5	110
6	juvenile	3	2	90
6	juvenile	2	3	130
6	juvenile	3	2.5	100
6	juvenile	3	2	80
6	juvenile	5	3	150
6	adult	1	3.5	110
6	juvenile	2	1.5	100
6	juvenile	5	2	120
7	juvenile	2	2	80
7	juvenile	2	1.5	70
7	juvenile	4	2.5	150
7	juvenile	2	2	90
7	juvenile	3	2	140
7	juvenile	3	3	160
7	juvenile	3	0.5	80
7	adult	3	3.5	130
7	juvenile	4	1.5	110
7	juvenile	4	2	120
7	juvenile	3	3	130
7	juvenile	3	2	80
7	juvenile	3	0.5	70
7	juvenile	2	2	60
7	juvenile	3	1.5	70
7	juvenile	2	1	100
7	juvenile	3	1.5	110
7	juvenile	3	3	140
7	juvenile	3	2.5	130
8	juvenile	3	2.5	130
8	juvenile	3	2.5	140
8	juvenile	3	3	130
8	adult	3	3.5	130
8	adult	3	3.5	150
8	adult	4	4.5	160
8	juvenile	3	2.5	130
8	adult	2	3.5	130
8	juvenile	2	1.5	90
9	adult	3	3.5	140
9	juvenile	2	2.5	130
9	juvenile	3	2	110
9	juvenile	3	2.5	140
9	juvenile	2	1.5	110
9	juvenile	3	1.5	120
9	juvenile	2	2	130
9	adult	3	3.5	120
9	juvenile	2	2	90
9	juvenile	3	2	130
9	juvenile	1	2	140
9	juvenile	3	2	160
9	juvenile	2	2.5	150
9	juvenile	3	3	130
9	juvenile	2	0.5	100
9	juvenile	2	0.5	80
9	juvenile	2	1.5	110
9	juvenile	3	2	120
9	juvenile	3	1.5	130
9	juvenile	3	3	150
9	juvenile	2	2.5	140
9	juvenile	3	3	150
9	juvenile	2	2.5	130
9	juvenile	1	3	140
9	juvenile	2	2.5	120
10	juvenile	4	2.5	130
10	juvenile	3	2	60
10	juvenile	2	2	90
11	juvenile	3	2.5	90
11	juvenile	3	2	100
11	adult	2	3.5	130
11	juvenile	3	2	120
11	juvenile	2	2.5	120
11	juvenile	2	2	120
11	juvenile	1	2.5	110
11	juvenile	4	2	130
11	juvenile	2	2.5	90
11	juvenile	1	3	140
11	juvenile	3	1.5	90
11	juvenile	1	2	80
11	juvenile	3	3	140
12	adult	5	3.5	130
12	adult	6	4	150
12	juvenile	3	2.5	120
12	juvenile	2	2.5	130
13	juvenile	2	1.5	60
13	juvenile	2	1.5	120
13	juvenile	2	1	80
13	juvenile	2	2	90
13	juvenile	1	1	80
13	juvenile	2	1.5	75
13	juvenile	2	1.5	80
13	juvenile	2	1.5	120
13	juvenile	4	2.5	140
13	adult	3	5	170
13	adult	3	3.5	160
14	juvenile	3	2.5	120
14	juvenile	2	0.3	50
14	juvenile	3	0.5	60
14	juvenile	4	0.5	70
14	juvenile	3	0.5	90
14	juvenile	1	2	80
14	juvenile	2	1.5	90
14	juvenile	3	1	60
15	No
16	adult	4	4.5	140
16	juvenile	4	3	130
16	juvenile	5	1.5	110
16	juvenile	3	2.5	160
16	juvenile	2	2	120
16	juvenile	3	2	130
16	juvenile	3	2.5	150
16	adult	1	3.5	160
16	juvenile	3	2.5	150
16	adult	1	3.5	160
16	juvenile	3	2.5	150
16	juvenile	1	1.5	70
16	juvenile	3	1	80
16	juvenile	4	2	80
16	juvenile	3	2.5	110
16	juvenile	3	2.5	140
16	juvenile	3	2.5	120
17	No
18	juvenile	5	2.5	130
19	No
20	No

## Sheet: Table 4
Table 4. Tamarix austromongolica shrubs occurring in sandy land behind the dams
Note: juvenile, basal diameter <=3cm; adult, basal diameter >3 cm; quadrat size, 10×10 m
quadrat code with Tamarix austromongolica	class	branch number	maximum basal diameter (cm)	height（cm）
1	juvenile	9	2.5	230
2	adult	12	3.5	270
2	adult	10	3.5	230
2	juvenile	8	3	170
2	juvenile	12	3	250
3	adult	11	3.5	180
3	juvenile	12	3	230
4	juvenile	6	3	220
5	adult	8	3.5	250
5	adult	6	4.5	270
5	adult	9	6.5	290
6	juvenile	7	2.5	280
6	adult	12	3.5	260
7	juvenile	11	2.5	220
7	juvenile	10	2	250
8	adult	12	3.5	270
8	juvenile	11	3	210
9	adult	13	3.5	180
9	juvenile	11	3	210
9	juvenile	9	2.5	160
10	adult	14	3.5	250
10	juvenile	8	2.5	200
11	adult	12	3.5	240
11	adult	11	4	230
11	juvenile	10	3	160
11	adult	5	4.5	200
12	adult	6	4.5	260
12	juvenile	12	3	220
12	juvenile	8	2.5	240
12	juvenile	6	2	230
13	adult	9	3.5	230
13	adult	6	4.5	260
13	juvenile	10	2.5	220
13	juvenile	6	2	220
14	juvenile	8	2	210
14	adult	12	3.5	250
14	juvenile	11	3	270
15	juvenile	10	1.5	210
15	adult	11	5	230
16	juvenile	12	2.5	250
16	juvenile	10	3	280
17	adult	9	3.5	260
17	adult	8	6.5	280
18	adult	6	8.5	320
18	juvenile	7	3	220
19	adult	12	4	260
19	adult	4	3.5	250
19	juvenile	10	3	260
19	adult	8	5	270
20	juvenile	10	3	250
20	juvenile	13	2.5	260

## Sheet: Table 5
Table 5. Relative positions of Tamarix austromongolica shrubs in supratidal flat before the dams
Note: position, relative occurring position in sampling line (m); class=1,juvenile, basal diameter <=3cm; class=2,adult,basal diameter >3 cm
position in sampling line (m)	class
0.9	1
2.1	1
2.2	1
2.25	1
2.3	1
2.35	1
2.8	1
2.9	2
12.4	1
13.1	1
13.2	1
13.6	1
13.65	1
13.7	1
13.8	1
14	1
14.1	1
19.2	1
19.8	1
20.1	1
20.8	1
24.4	1
24.5	1
24.6	1
28.4	2
28.45	1
28.5	1
28.55	1
28.6	1
31.2	1
31.5	1
75.1	1
75.2	1
79.8	2
87.8	2
87.9	1
88.1	1
88.15	1
110.2	1
114.4	1
114.8	1
116.1	1
116.75	2
116.8	1
117.5	2
137.1	2
139.8	1
139.9	1
158.7	2
160.1	1
160.2	2
163.8	1
172	1
186.6	2

## Sheet: Table 6
Table 6. Relative positions of Tamarix austromongolica shrubs in sandy land behind the dams
Note: position, relative occurring position in sampling line (m); class=1,juvenile, basal diameter <=3cm; class=2,adult,basal diameter >3 cm
position in sampling line (m)	class
1	2
7.5	2
16.4	2
21.8	2
33.2	2
38	1
64.3	1
68.8	2
76.8	2
91.3	1
99.6	1
115.7	2
119.5	1
126.2	2
130.3	2
140.5	2
152.3	1
158.4	2
165.8	2
171.3	1
183.5	2
198.5	1
